# Supplementary material for: Total phenolic and flavonoid contents and antioxidant, anti-inflammatory, analgesic, antipyretic and antidiabetic activities of Cordia myxa L. leaves
Source: Springer Nature journal article supplement (doi:10.1186/s40816-019-0125-z), 2019-09-08
Supplement: MOESM4 [file 17149678]

| Total extract  IC50= 1.33 mg/ml 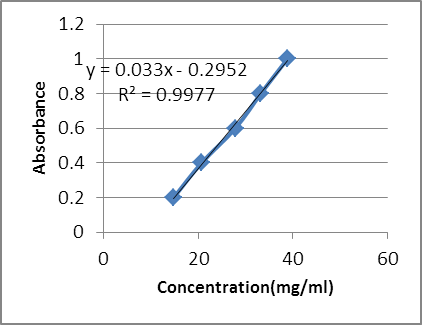 | Pet. Ether fraction  IC50= 1.21mg/ml 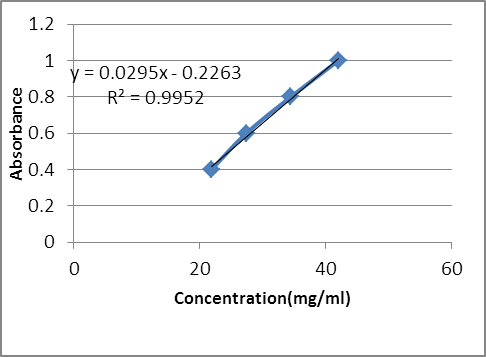 |
| --- | --- |
| Dichloromethane fraction  IC50= 1.03mg/ml 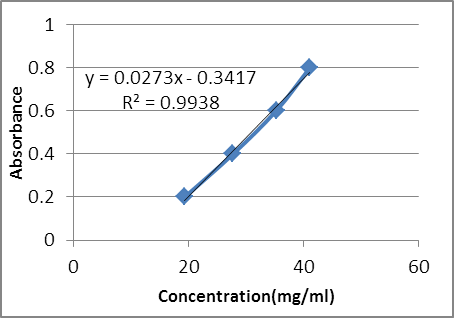 | Ethyl acetate fraction  IC50= 0.03 mg/ml 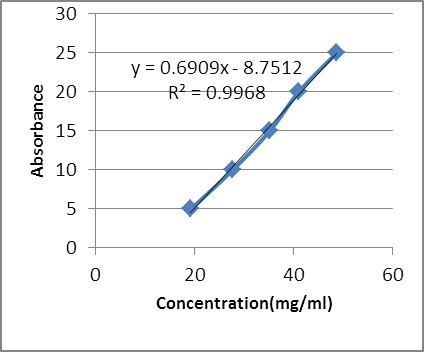 |
| Butanol fraction  IC50= 1.28mg/ml 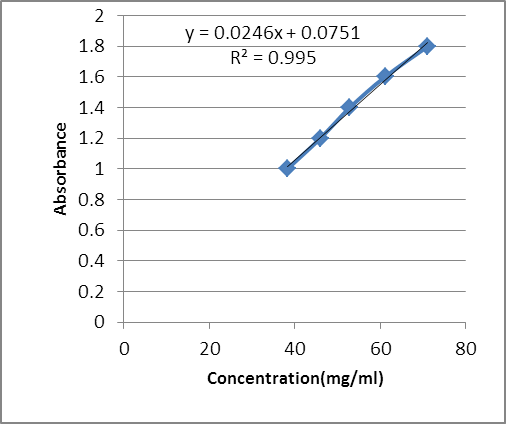 | |

**Figure S7.** Diagram representing IC50 of the total ethanol extract and the different fractionsof *C. myxa* L. leaves using DPPH method


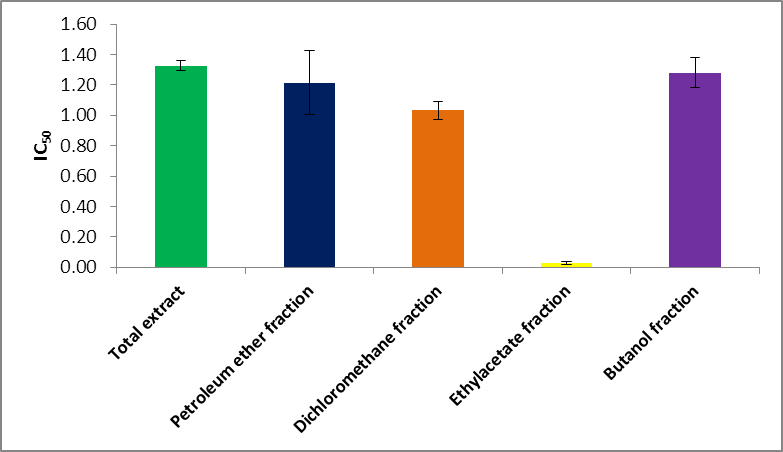


**

***

**Figure S6.** The free radical scavenging activities of the total ethanol extract and the different fractions of *C. myxa* L. leaves using DPPH method
