# Supplementary material for: Total phenolic and flavonoid contents and antioxidant, anti-inflammatory, analgesic, antipyretic and antidiabetic activities of Cordia myxa L. leaves
Source: Springer Nature journal article supplement (doi:10.1186/s40816-019-0125-z), 2019-09-08
Supplement: MOESM8 [file 17149678]

| 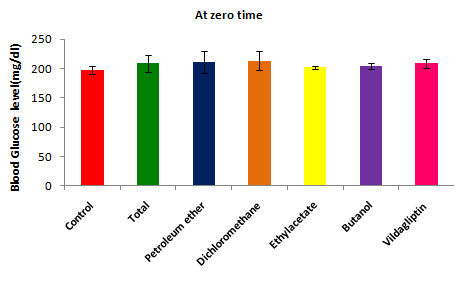 | 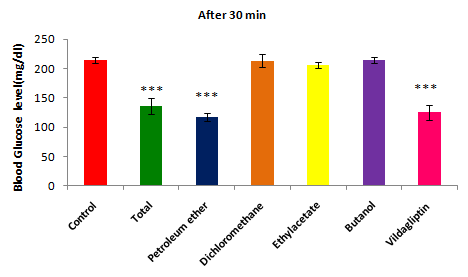 |
| --- | --- |
| 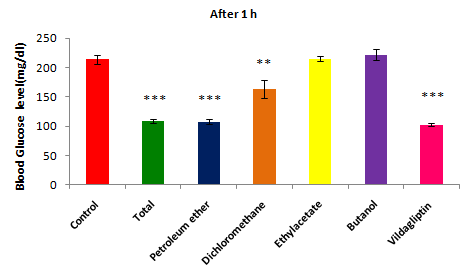 | 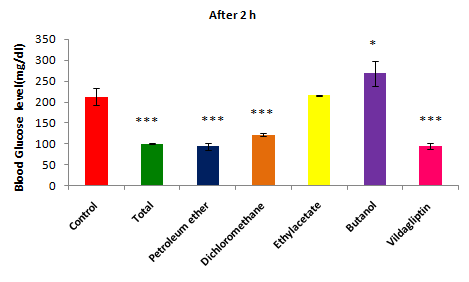 |
| 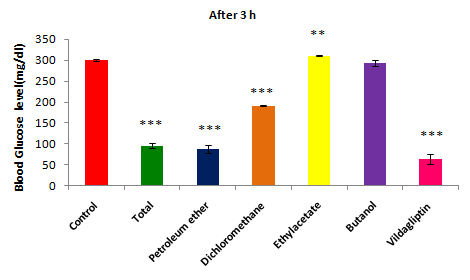 | 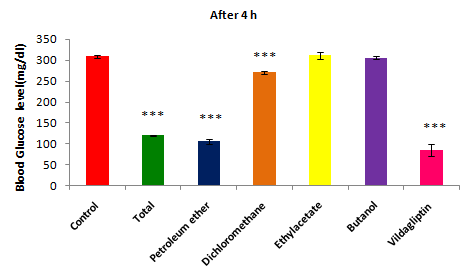 |
| 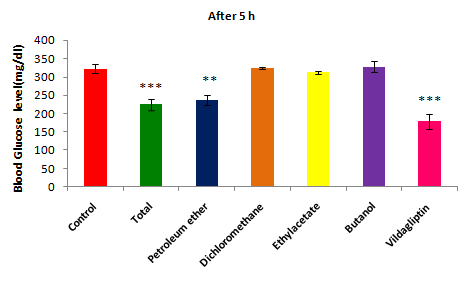 | |

**Figure S14.** Diagram representing the antidiabetic effects of the total ethanol extract and the different fractions of *C. myxa* L. leaves using streptozotocin-induced hyperglycemia method and vildagliptin as a standard

**Figure S15.** Diagram representing the percentage of decrease in blood glucose level of the total ethanol extract and the different fractions of *C. myxa* L. leaves using vildagliptin as a standard.
